# Supplementary material
Source: Frontiers journal article supplement (https://www.frontiersin.org/articles/257558)
Supplement: Data_Sheet_1.DOCX [file Data_Sheet_1.DOCX]

**Annex 1: Composition of JPND Longitudinal Cohort Studies Working Groups**

**HD-READy (High-Dimensional Research in Alzheimer’s Disease)**

| **Working Group Member** | **Institution** | **Country** |
| --- | --- | --- |
| Arfan Ikram (coordinator) | Erasmus Medical Centre, Rotterdam | The Netherlands |
| Cornelia M. van Duijn | Erasmus Medical Centre, Rotterdam | The Netherlands |
| Meike Vernooij | Erasmus Medical Centre, Rotterdam | The Netherlands |
| Hieab Adams | Erasmus Medical Centre, Rotterdam | The Netherlands |
| Hans Grabe | Greifswald University | Germany |
| Alexander Teumer | Greifswald University | Germany |
| Stéphanie Debette | Paris 7 University | France |
| Bernard Mazoyer | University of Bordeaux | France |
| Joanna Wardlaw | University of Edinburgh | UK |
| Reinhold Schmidt | University of Graz | Austria |
| Helena Schmidt | University of Graz | Austria |
| Kamran Ikram | National University Singapore | Singapore |
| Sudha Seshai | Boston University | USA |
| Vincent Chouraki | Boston University | USA |
| Myriam Fornage | University of Houston | USA |
| Paul Nyquist | Johns Hopkins University | USA |
| Christiane Reitz | Columbia University | USA |
| Claudia Satizabal | Boston University | USA |
| Derrek Hibar | University of Southern California | USA |
| Ganesh Chauhan | Paris 7 University | France |
| Gennady Roshchupkin | Erasmus Medical Centre, Rotterdam | The Netherlands |
| Jeroen van der Grond | Leiden University Medical Centre | The Netherlands |
| Natalia Rost | Harvard Medical School | USA |
| Neda Jahanshad | University of Southern California | USA |
| Paul Thompson | University of Southern California | USA |
| Saima Hilal | National University Singapore | Singapore |
| Sarah Madsen | University of Southern California | USA |
| Sven van der Lee | Erasmus Medical Centre, Rotterdam | The Netherlands |
| Ton de Craen | Leiden University Medical Centre | The Netherlands |
| Wiro Niessen | Erasmus Medical Centre, Rotterdam | The Netherlands |

**Harmonization and innovation of cognitive, behavioural and functional assessment in neurodegenerative dementias**

| **Working Group Member** | **Institution** | **Country** |
| --- | --- | --- |
| Alberto Costa (coordinator) | I.R.C.C.S. Fondazione Santa Lucia and Niccolò  Cusano University, Rome | Italy |
| Mathieu Ceccaldi | University Hospital La Timone, Marseille | France |
| Paolo Caffarra | University of Parma | Italy |
| Carlo Caltagirone | I.R.C.C.S. Fondazione Lucia, University of Rome | Italy |
| Stefano Cappa | IUSS Pavia + San Raffaele Scientific Institute, Milan | Italy |
| Pietro Tiraboschi | Fondazione Carlo Besta, Milan | Italy |
| Thomas Bak | University of Edinburgh | UK |
| Sebastian Crutch | University College of London | UK |
| Sergio Della Sala | University of Edinburgh | UK |
| Bruno Dubois | Hôpital de la Pitié-Salpêtrière | France |
| Emrah Duzel | German Center for Neurodegenerative Diseases and University College of London | Germany and UK |
| Peter Nestor | German Center for Neurodegenerative Diseases | Germany |
| Sokratis Papageorgiou | University of Athens Medical School | Greece |
| Martin Rossor | University College of London | UK |
| Eric Salmon | University Hospital of Liege | Belgium |
| Philip Scheltens N | VU University Medical Center, Amsterdam | The Netherlands |
| Wilhelem van de Flier | VU University Medical Center, Amsterdam | The Netherlands |
| Pieter Jelle Visser | Maastricht University Medical Centre | The Netherlands |
| Gunhild Waldemar | University of Copenhagen | Denmark |
| Sietske Sikkes | VU University Medical Center, Amsterdam | The Netherlands |
| Fabienne Collette | Cyclotron Research Centre and University of Liège | Belgium |
| Jean François Démonet | Lausanne University Hospital | Switzerland |

**NETCALS (Network of Cohort Assessment in ALS)**

| **Working Group Member** | **Institution** | **Country** |
| --- | --- | --- |
| Leonard H. van den Berg (coordinator) | University Medical Centre Utrecht | The Netherlands |
| Jan Veldink | University Medical Centre Utrecht | The Netherlands |
| Albert C. Ludolph | Ulm University | Germany |
| Susanne Petri | Hannover Medical School | Germany |
| Thomas Meyer | Charité – Universitätsmedizin Berlin | Germany |
| Julian Grosskreutz | Jena University Hospital | Germany |
| Ammar Al-Chalabi | King’s College London | UK |
| Martin Turner | University of Oxford | UK |
| Kevin Talbot | University of Oxford | UK |
| Sharon Abrahams | University of Edinburgh | UK |
| Pamela Shaw | University of Sheffield | UK |
| Peter M. Andersen | Umeå University | Sweden |
| François Salachas | Hopitaux de Paris | France |
| Pierre-François | Pradat Hôpital de la Pitié-Salpêtrière, Paris | France |
| Philippe Couratier | University Hospital UMR 1094, Limoges | France |
| Philippe Corcia | CHRU Tours | France |
| David Devos | Université Lille | France |
| Adriano Chio | University of Turin | Italy |
| Vincenzo Silani | Milan Medical School | Italy |
| Magdalena Kuzma-Kozakiewicz | Kozakiewicz Medical Universtiy of Warsaw | Poland |
| Orla Hardiman | Trinity College Dublin | Ireland |
| Philip Van Damme | University Hospital Leuven | Belgium |
| Wim Robberecht | University Hospital Leuven | Belgium |
| Markus Weber | Kantonsspital St. Gallen | Switzerland |
| Mamede de Carvalho | University of Lisbon | Portugal |
| Jesus S. Mora | Complejo Universitario La Paz, Madrid | Spain |

**21st Century Eurodem - Repurposing Cohorts for Dementia Studies**

| **Working Group Member** | **Institution** | **Country** |
| --- | --- | --- |
| Carol Brayne (coordinator) | University of Cambridge | UK |
| Chris Fox | University of East Anglia | UK |
| Fiona Matthews | Newcastle University | UK |
| Blossom Stephan | Newcastle University | UK |
| Craig Ritchie | University of Edinburgh | UK |
| Rose Anne Kenny | Trinity College Dublin | Ireland |
| Arfan Ikram | Erasmus MC | Netherlands |
| Edo Richard | Radboud University Medical Centre, Nijmegen | Netherlands |
| Laura Fratiglioni | Karolinska Institute | Sweden |
| Miia Kivipelto | Karolinska Institute | Sweden / Finland |
| Ingmar Skoog | University of Gothenburg | Sweden |
| Chengxuan Qui | Karolinska Institute | Sweden |
| Carole Dufouil | INSERM | France |
| Monique Breteler | German Center for Neurodegenerative Diseases (DZNE) | Germany |
| Steffi Riedel-Heller | University of Leipzig | Germany |
| Massimo Musicco | Institute of Biomedical Technologies | Italy |
| Annalena Venneri | IRCCS Fondazione Ospedale San Camillo | Italy |
| Antonio Lobo | University of Zaragoza | Spain |

**Multi-centre cohort-studies in Lewy-body dementia: Challenges in harmonizing different clinical and biomarker protocols**

| **Working Group Member** | **Institution** | **Country** |
| --- | --- | --- |
| Dag Aarsland (coordinator) | Stavanger University Hospital | Norway |
| Frederic Blanc | University Hospital of Strasbourg and CNRS | France |
| Brit Mollenhauer | Kassel and University Medical Center Göettingen | Germany |
| Roberta Biundo | Fondazione Ospedale San Camillo, Venice-Lido | Italy |
| Per Svenningsson | Karolinska Institutet, Stockholm | Sweden |
| Evelien Lemstra | VU Medical Centre, Amsterdam | Netherlands |
| Ian McKeith | Newcastle University | UK |
| Oskar Hansson | Lund University, Malmö | Sweden |
| Elisabet Londos | Lund University, Malmö | Sweden |
| Inger van Steenoven | VU Medical Centre, Amsterdam | The Netherlands |
| Irena Rektorova | Central European Institute of Technology Masaryk University, Brno | Czech Republic |
| Milica Kramberger | University Medical Centre, Ljubljana | Slovenia |
| Tormod Fladby | Akershus University Hospital, Oslo | Norway |
| Clive Ballard | King’s College London | UK |
| Richard Dodel | University Hospital of Giessen and Marburg | Germany |
| Laura Bonanni | G. d’Annunzio University, Chieti | Italy |
| Gert J. Geurtsen | Academic Medical Hospital, Amsterdam | The Netherlands |
| Daniel Weintraub | University of Pennsylvania, Philadelphia | USA |
| Angelo Antonin | Fondazione Ospedale San Camillo, Venice-Lido | Italy |
| Bengt Winblad | Karolinska Institutet, Stockholm | Sweden |
| Alexandra Bernadotte | Institute of Experimental Medicine, St Petersburg | Russia |
| Arvid Rongve | Haugesund Hospital, Haugesund | Norway |
| Henrik Zetterberg | University of Gothenburg | Germany |
| Cristian Falup-Pecurariu | Transilvania University, Brasov | Romania |
| Sevasti Bostantjopoulou | Aristotle University of Thessaloniki | Greece |
| Zoe Katsarou | Aristotle University of Thessaloniki | Greece |
| Frank Jan de Jong | Erasmus Medical Centre, Rotterdam | The Netherlands |
| Maria Petrova | University Hospital “Alexandrovska”, Sofia | Bulgaria |
| Latchezar Traykov | University Hospital “Alexandrovska”, Sofia | Bulgaria |
| Eric Westman | Karolinska Institutet | Sweden |
| Sara Gpacek | Karolinska Institutet | Sweden |
| Josep Garre, ReDeGi | University of Girona, Catalunya | Spain |
| Carla Abdelnour Ruiz | ACE Institut Català de Neurociències Aplicades | Spain |
| Elka Stefanova | University of Belgrade | Serbia |
| Flavio Nobili | University of Genoa | Italy |
| Zuzana Walker | University College London and North Essex Partnership University NHS Foundation Trust | UK |
| Jan Booij | Academic Medical Centre, Amsterdam | The Netherlands |
| Ray K Chaudhury | King’s College London | UK |
| John O'Brien | University of Cambridge | UK |
| John-Paul Taylor | Newcastle University | UK |

**Developing a methodological framework for trials in presymptomatic neurodegenerative disease – the Presymptomatic Neurodegeneration Initiative (PreNI)**

| **Working Group Member** | **Institution** | **Country** |
| --- | --- | --- |
| Jonathan D Rohrer  (coordinator) | Dementia Research Centre, UCL Institute of Neurology,  WC1N 3BG | UK |
| Nick Fox | University College London | UK |
| Martin Rossor | University College London | UK |
| Simon Mead | University College London | UK |
| Sarah Tabrizi | University College London | UK |
| Nick Wood | University College London | UK |
| Huw Morris | University College London | UK |
| Andre Strydom | University College London | UK |
| Jason Warren | University College London | UK |
| Jonathan Schott | University College London | UK |
| Cath Mummery | University College London | UK |
| Henrik Zetterberg | University College London | UK |
| John Hardy | University College London | UK |
| Alastair Noyce | University College London | UK |
| Alex Gerhard | University of Manchester | UK |
| James Rowe | University of Cambridge | UK |
| Martin Turner | University of Oxford | UK |
| Kevin Talbot | University of Oxford | UK |
| Alexis Brice | ICM, Brain and Spine Institute | France |
| Isabelle Leber | ICM, Brain and Spine Institute | France |
| Olivier Colliot | ICM, Brain and Spine Institute | France |
| Stephane Lehericy | ICM, Brain and Spine Institute | France |
| Alexandra Durr | ICM, Brain and Spine Institute | France |
| Jean-Christophe Corvol | ICM, Brain and Spine Institute | France |
| John van Swieten | Erasmus Medical Centre, Rotterdam | The Netherlands |
| Caroline Graff | Karolinska Institutet | Sweden |
| Thomas Klockgether | German Center for Neurodegenerative Diseases | Germany |
| Bernhard Landwehrmeyer | University of Ulm | Germany |
| Thomas Gasser | University of Tubingen | Germany |
| Adrian Danek | University of Munich | Germany |
| Barbara Borroni | University of Brescia | Italy |
| Daniela Galimberti | Fondazione Ca Granda, IRCCS Ospedale Maggiore Policlinico | Italy |
| Fabrizio Tagliavini | Istituto Carlo Besta Milano | Italy |

**Harmonization of biomarker assessment in longitudinal cohort studies in Parkinson’s disease**

| **Working Group Member** | **Institution** | **Country** |
| --- | --- | --- |
| Daniela Berg (coordinator) | University of Tuebingen | Germany |
| Guido Alves | Stavanger University Hospital | Norway |
| Paolo Barone | University of Salerno | Italy |
| Yoav Ben-Shlomo | University of Bristol | UK |
| Henk W. Berendse | VU University Medical Centre, Amsterdam | The Netherlands |
| Bastiaan Bloem | Radboud University Medical Center, Nijmegen | The Netherlands |
| David Burn | Newcastle University | UK |
| Richard Dodel | Philipps-Universität Marburg | Germany |
| Donald Grosset | South Glasgow Hospital, Glasgow | UK |
| Michele Hu | University of Oxford | UK |
| Meike Kasten | University of Lübeck | Germany |
| Rejko Krüger | University of Luxembourg and Centre Hospitalier de Luxembourg | Luxembourg |
| Inga Liepelt-Scarfone | University of Tuebingen | Germany |
| Walter Maetzler | University of Tuebingen | Germany |
| Brit Mollenhauer | Kassel & University Medical Center, Göettingen | Germany |
| Wolfgang Oertel | Philipps-Universität Marburg | Germany |
| Stefanie Behnke | University of Hamburg | Germany |
| Uwe Walter | University of Rostock | Germany |
| Karin Wirdefeldt | Karolinska University, Stockholm | Sweden |

**Dementia Outcome Measures: Charting New Psychosocial Territory**

| **Working Group Member** | **Institution** | **Country** |
| --- | --- | --- |
| Gail Mountain (coordinator) | University of Sheffield | UK |
| Esme Moniz-Cook | University of Hull | UK |
| Martina Roes | Deutsches Zentrum für Neurodegenerative Erkrankungen e. V. (DZNE) | Germany |
| Rose-Marie Droes | VU University Medical Center, Amsterdam | Netherlands |
| Franka Meiland | VU University Medical Center, Amsterdam | The Netherlands |
| Ann Pascoe | Family Carer – for Alzheimers Europe | UK |
| Bob Woods | Bangor University | UK |
| Charlotte Stoner (PhD student) | University College London | UK |
| Daniela Holle | Deutsches Zentrum für Neurodegenerative Erkrankungen e. V. (DZNE) | Germany |
| Frans Verhey | Maastricht University | The Netherlands |
| Jill Manthorpe | King’s College London | UK |
| Rabih Chattat | University of Bologna | Italy |
| Emma Wolverson | University of Hull | UK |
| Marjolein deVugt | Maastricht University | The Netherlands |
| Katherine Algar | Bangor University | UK |
| Daphne Wallace | Person with Dementia- for Alzheimers Europe | UK |
| Iva Holmerova | Charles University, Prague | Czech Republic |
| Karlijn Joling | VU University Medical Center, Amsterdam | The Netherlands |
| Margareta Halek | Deutsches Zentrum für Neurodegenerative Erkrankungen e. V. (DZNE) | Germany |
| Chris Clarke | University of Hull | UK |
| Myrra Vernooij-Dassen | Radboud University Nijmegen Medical Centre | The Netherlands |
| Laila Oksnebjerg (PhD Student) | Copenhagen University Hospital | Denmark |
| Martin Orrell | University of Nottingham | UK |
| Bart Hattink (PhD student) | VU University Medical Center, Amsterdam | The Netherlands |
| Jennifer Wenborn | University College London | UK |
| Orii Mcdermott | University College London | UK |
| Stefanie Auer | Donau Universität Krems | Austria |
| Ana Diaz | Alzheimer’s Europe | Luxembourg |
| Becky Field (PhD student) | University of Sheffield | UK |
| Manuel Franco | Salamanca University | Spain |
| Debby Gerritsen | Radboud University, Nijmegen | The Netherlands |
| Dianne Gove | Alzheimer’s Europe | Luxembourg |
| Aud Johannessen | Norwegian National Advisory Unit on Ageing and Health | Norway |
| Ingun Ulstein | Oslo University Hospital | Norway |
| Marijke Van Dijk (PhD student) | VU University Medical Center, Amsterdam | The Netherlands |
| Louise Lafortune | University of Cambridge | UK |
| Yun-Hee Jeon | University of Sydney | Australia |
| Sarah Smith (PhD student) | University of Sheffield | UK |
| Ron Handels (PhD student) | Maastricht University | The Netherlands |
| Steven Martin (Research Assistant) | University of Cambridge | UK |
| Hein van Hout | VU University Medical Center, Amsterdam | The Netherlands |
| Jackie Rutherford (PhD student) | University College London | UK |
| Hana Vankova | Charles University, Prague | Czech Republic |
| Karin Wolf-Ostermann | Bremen University | Germany |
| Aimee Spector | University College London | UK |
| Gunhild Waldemar | Copenhagen University | Denmark |
| Murna Downs | Bradford University | UK |
| Georginal Charlesworth | University College London | UK |
| Suzanne Cahill | Trinity College, Dublin | Ireland |
| Maud Graff | Radboud University, Nijmegen | The Netherlands |
| Ulla Eloniemi-Sulkava | University of Tampere/Central Union of Welfare of the Aged,Helsinki | Finland |

**Body fluid biobanking of longitudinal cohorts in neurodegenerative diseases**

| **Working Group Member** | **Institution** | **Country** |
| --- | --- | --- |
| Charlotte Teunissen (coordinator) | VU University Medical Center, Amsterdam | The Netherlands |
| Reinhard Schneider | University of Luxembourg | Luxembourg |
| Kirsten Roomp | University of Luxembourg | Luxembourg |
| Fay Betsou | Integrated Biobank of Luxembourg | Luxembourg |
| Piotr Lewczuk | Universitätsklinikum Erlangen | Germany |
| Henrik Zetterberg | University of Gothenburg and UCL | Sweden and UK |
| Bengt Winblad | Karolinska Institutet | Sweden |
| Eline Willemse | VU University Medical Center, Amsterdam | The Netherlands |
| Peter-Jelle Visser | VU University Medical Center Amsterdam and Maastricht University | The Netherlands |

**METACOHORTS: Realising the potential of cohort studies to determine the vascular contribution to neurodegeneration**

| **Working Group Member** | **Institution** | **Country** |
| --- | --- | --- |
| Joanna Wardlaw (coordinator) | University of Edinburgh | UK |
| Martin Dichgans | University of Munich and German Center for Neurodegenerative Diseases (DZNE), Munich | Germany |
| Monique Breteler | University of Bonn | Germany |
| Reinhold Schmidt | University of Graz | Austria |
| Eric Jouvent | Hopital Lariboisiere, Université Denis Diderot | France |
| Charlotte Cordonnier | University of Lille | France |
| Leonardo Pantoni | University of Florence and Azienda Ospedaliero Universitaria Careggi, Florence | Italy |
| Frank-Erik de Leeuw | University Nijmegen | The Netherlands |
| Robert van Oostenbrugge | Maastricht University Medical Centre | The Netherlands |
| Geert-Jan Biessels | UMC Utrecht | The Netherlands |
| Arfan Ikram | Erasmus University | The Netherlands |
| Meike Vernooij | Erasmus University | The Netherlands |
| Carol Brayne | University of Cambridge | UK |
| John O'Brien | University of Cambridge | UK |
| Paul Matthews | Imperial College | UK |
| Blossom Stephan | Newcastle University | UK |
| David Werring | University College London | UK |
| Eric Smith | University of Calgary | Canada |
| Christopher Chen (Expert Advisor) | National University of Singapore | Singapore |
| Vincent Mok (Expert Advisor) | The Chinese University of Hong Kong | China |
| Bo Norrving (Expert Advisor) | Lunds Universitet | Sweden |
| Alvaro Alonso | University of Minnesota | USA |
| Oscar Benavente | University of British Columbia | Canada |
| Fergus Doubal | University of Edinburgh | UK |
| Marco Düring | University of Munich | Germany |
| Michael Ewers | University of Munich | Germany |
| Emrah Duzel | University College London | UK |
| Richard Frayne | University of Calgary | Canada |
| Franz Fazekas | Medical University of Graz | Austria |
| Frank Jessen | University Hospital Cologne | Germany |
| Jennifer Linn | Dresden University Hospital | Germany |
| Rainer Malik | University of Munich | Germany |
| Bernard Mazoyer | University of Bordeaux | France |
| Perminder Sachdev | University of New South Wales | Australia |
| Sudha Sheshadri | Boston University | USA |
| Luciano Sposato | Western University | Canada |
| Rick Swartz | University of Toronto | Canada |
| Anand Viswanathan | Massachusetts General Hospital | USA |
| Karin Waegemann | University of Munich | Germany |
| Will Whiteley | University of Edinburgh | UK |
| Vera Zietemann | University of Munich | Germany |
