# Supplementary material
Source: Frontiers journal article supplement (https://www.frontiersin.org/articles/257558)
Supplement: Table_1.DOC [file Table_1.DOC]

**Table 1: List of ten funded Working Groups**

| **Working Group** | **Coordinator and sponsor country** | **Number of countries** |
| --- | --- | --- |
| HD-READy (High-Dimensional Research in Alzheimer’s Disease) | M. Arfan Ikram, Erasmus University Medical Centre, Rotterdam, Netherlands  Sponsor country: Netherlands | Eight |
| Harmonization and innovation of cognitive, behavioural and functional assessment in neurodegenerative dementias | Alberto Costa, IRCCS Fondazione Santa Lucia, Rome, Italy  Sponsor country: Italy | Nine |
| NETCALS (Network of Cohort Assessment in ALS) | Leonard van den Berg, University Medical Centre, Utrecht, Netherlands  Sponsor country: France | Twelve |
| 21st Century Eurodem - Repurposing Cohorts for Dementia Studies | Carol Brayne, University of Cambridge, UK  Sponsor country: Sweden | Ten |
| Multi-centre cohort-studies in Lewy-body dementia: Challenges in harmonizing different clinical and biomarker protocols | Dag Aarsland, Stavanger University Hospital, Stavanger, Norway  Sponsor country: Norway | Nine |
| Presymptomatic Neurodegeneration Initiative (PreNI): Developing a methodological framework for trials in presymptomatic neurodegenerative disease | Jonathan Rohrer, University College London, UK Sponsor country: UK | Six |
| Harmonization of biomarker assessment in longitudinal cohort studies in Parkinson’s disease | Daniela Berg, Hertie-Institute for Clinical Brain Research and German Center for Neurodegenerative Diseases, Tübingen, Germany  Sponsor country: Germany | Seven |
| Dementia Outcome Measures: Charting New Territory | Gail Mountain, University of Sheffield, UK  Sponsor country: Denmark | Five |
| Body fluid biobanking of longitudinal cohorts in neurodegenerative diseases | Charlotte Teunissen, VU University Medical Centre, Amsterdam, Netherlands  Sponsor country: Luxembourg | Five |
| METACOHORTS: Realising the potential of cohort studies to determine the vascular contribution to neurodegeneration | Joanna Wardlaw, University of Edinburgh, Edinburgh, UK  Sponsor country: Canada | Eleven |
